# Supplementary material
Source: PubMed Central journal article supplement (PMC9287402)
Supplement: 41418_2021_925_MOESM3_ESM.pdf [file 41418_2021_925_MOESM3_ESM.pdf]

Please complete the table below to indicate the contributions of all named authors to the figures.

Figure 1:

|  |
|--|
|  |
|--|

Figure 2:

|  |
|--|
|  |
|--|

Figure 3:

|  |
|--|
|  |
|--|

Figure 4:

|  |
|--|
|  |
|--|

Figure 5:

|  |
|--|
|  |
|--|

Figure 6:

|  |
|--|
|  |
|--|

Signed for and on behalf of the Author(s):

*JinWooLee Hae-Won Kim*

Print Name:

|  |
|--|
|  |
|--|

Date:

|  |
|--|
|  |
|--|
