# Supplementary material
Source: PubMed Central journal article supplement (PMC9287402)
Supplement: 41418_2021_925_MOESM4_ESM.pdf [file 41418_2021_925_MOESM4_ESM.pdf]

**Important information. Please read.**

- This form should be used by authors to request any change in authorship (adding/deleting authors) including changes in corresponding authors. This form should not be used for name changes. Please fully complete all sections. Use black ink and block capitals and provide each author's full name with the given name first followed by the family name.
- By signing this declaration, all authors guarantee that the order of the authors are in accordance with their scientific contribution, if applicable as different conventions apply per discipline, and that only authors have been added who made a meaningful contribution to the work.
- Please note, in author collaborations where there is formal agreement for representing the collaboration, it is sufficient for the representative or legal guarantor (usually the corresponding author) to complete and sign the Authorship Change Form on behalf of all authors, **next to the added/removed author(s). (Complete Section 3, followed by Section 6.)**  
 In author collaborations where there is no formal agreement for representing the collaboration and **there are more than 10 authors**, one may sign for all, provided the signer appends correspondence that attests that each of the authors have agreed to the change **and the added/removed authors sign the form. (Complete Section 3, followed by Section 6.)**
- Please note, we cannot investigate or mediate any authorship disputes. If you are unable to obtain agreement from all authors (including those who you wish to be removed) you must refer the matter to your institution(s) for investigation. Please inform us if you need to do this.
- If you are not able to return a fully completed form within **30 days** of the date that it was sent to the author requesting the change, we may have to withdraw your manuscript. We cannot publish manuscripts where authorship has not been agreed by all authors (including those who have been removed).
- Incomplete forms will be rejected.
- Please return/upload this form, fully completed, to the Journals Editorial Office. The Journal and/or Publisher will consider the information you have provided to decide whether to approve the proposed change in authorship. We may decide to contact your institution for more information or undertake a further investigation, if appropriate, before making a final decision.

**Section 1: Please provide the current title of manuscript**

**Manuscript ID no.:** CDD-21-1535RR

**Title:** TLR4 downregulation by the RNA-binding protein PUM1 alleviates cellular aging and osteoarthritis

**Section 2: Please provide the previous authorship, in the order shown on the manuscript before the changes were introduced. Please indicate the corresponding author by adding (CA) behind the name.**

|                         | First name(s) | Family name | ORCID or SCOPUS id, if available                                                          |
|-------------------------|---------------|-------------|-------------------------------------------------------------------------------------------|
| 1 <sup>st</sup> author  | Dong Suk      | Yoon        | <a href="https://orcid.org/0000-0001-5945-5569">https://orcid.org/0000-0001-5945-5569</a> |
| 2 <sup>nd</sup> author  | Kyoung-Mi     | Lee         |                                                                                           |
| 3 <sup>rd</sup> author  | Yoorim        | Choi        |                                                                                           |
| 4 <sup>th</sup> author  | Eun Ae        | Ko          |                                                                                           |
| 5 <sup>th</sup> author  | Na-Hyun       | Lee         |                                                                                           |
| 6 <sup>th</sup> author  | Sehee         | Cho         |                                                                                           |
| 7 <sup>th</sup> author  | Kwang Hwan    | Park        |                                                                                           |
| 8 <sup>th</sup> author  | Hae-Won       | Kim (CA)    | <a href="https://orcid.org/0000-0001-6400-6100">https://orcid.org/0000-0001-6400-6100</a> |
| 9 <sup>th</sup> author  | Jin Woo       | Lee (CA)    | <a href="https://orcid.org/0000-0002-0293-9017">https://orcid.org/0000-0002-0293-9017</a> |
| 10 <sup>th</sup> author |               |             |                                                                                           |

Please use an additional sheet if there are more than 10 authors.

**Section 3: Please provide a justification for change. Please use this section to explain your reasons for changing the authorship of your manuscript, e.g. what necessitated the change in authorship? Please refer to the (journal) policy pages for more information about authorship. Please explain why omitted authors were not originally included and/or why authors were removed on the submitted manuscript.**

In this revision, Dr. Jung-Hwan Lee has been newly added as a coauthor. Dr. Jung-Hwan Lee conducted MSC differentiation-related experiments and gave advice on revising the current manuscript and reviewed the revised version of the manuscript. Thus, this author meets the criteria of the authorship.

**Section 4: Proposed new authorship. Please provide your new authorship list in the order you would like it to appear on the manuscript. Please indicate the corresponding author by adding (CA) behind the name. If the Corresponding Author has changed, please indicate the reason under section 3.**

|                         | First name(s) | Family name (this name will appear in full on the final publication and will be searchable in various abstract and indexing databases) | Affiliated institute                  | E-mail address       |
|-------------------------|---------------|----------------------------------------------------------------------------------------------------------------------------------------|---------------------------------------|----------------------|
| 1 <sup>st</sup> author  | Dong Suk      | Yoon                                                                                                                                   | Yonsei University College of Medicine | sejonguniv@naver.com |
| 2 <sup>nd</sup> author  | Kyoung-Mi     | Lee                                                                                                                                    | Yonsei University College of Medicine | oxy002@yuhs.ac       |
| 3 <sup>rd</sup> author  | Yoorim        | Choi                                                                                                                                   | Yonsei University College of Medicine | cayyl1107@gmail.com  |
| 4 <sup>th</sup> author  | Eun Ae        | Ko                                                                                                                                     | Yonsei University College of Medicine | eunae0404@yuhs.ac    |
| 5 <sup>th</sup> author  | Na-Hyun       | Lee                                                                                                                                    | Dankook University                    | nhlee0609@gmail.com  |
| 6 <sup>th</sup> author  | Sehee         | Cho                                                                                                                                    | Yonsei University College of Medicine | sehee5717@yuhs.ac    |
| 7 <sup>th</sup> author  | Kwang Hwan    | Park                                                                                                                                   | Yonsei University College of Medicine | khpark@yuhs.ac       |
| 8 <sup>th</sup> author  | Jung-Hwan     | Lee                                                                                                                                    | Dankook University                    | ducious@gmail.com    |
| 9 <sup>th</sup> author  | Hae-Won       | Kim (CA)                                                                                                                               | Dankook University                    | kimhw@dku.edu        |
| 10 <sup>th</sup> author | Jin Woo       | Lee (CA)                                                                                                                               | Yonsei University College of Medicine | ljwos@yuhs.ac        |

Please use an additional sheet if there are more than 10 authors.

Section 5: Author contribution, Acknowledgement and Disclosures. Please use this section to provide a new disclosure statement and, if appropriate, acknowledge any contributors who have been removed as authors and ensure you state what contribution any new authors made (if applicable per the journal or book (series) policy). **Please ensure these are updated in your manuscript - after approval of the change(s) - as our production department will not transfer the information in this form to your manuscript.**

**New acknowledgements:**

DSY designed the study, performed the experiments, analyzed the data, and wrote the paper. K-ML, YC, EAK, N-HL, SC, KHP, and J-HL performed in vitro and in vivo experiments. HWK and JWL designed the study, interpreted the data, and revised the paper

**New Disclosures (financial and non-financial interests, funding):**

None

**New Author Contributions statement (if applicable per the journal policy):**

Dr. Jung-Hwan Lee conducted MSC differentiation-related experiments and gave advice on revising the current manuscript and reviewed the revised version of the manuscript.

State 'Not applicable' if there are no new authors.

**Section 6: Declaration of agreement. All authors, unchanged, new and removed *must* sign this declaration.**

(NB: Please print the form, (docu)-sign and return/upload a scanned copy. Please note that signatures that have been inserted as an image file are acceptable as long as it is handwritten. Typed names in the signature box are unacceptable.) \* Please delete as appropriate. Delete all of the bold if you were on the original authorship list and are remaining as an author.

|                         | First name | Family name |                                                                                                                                                                               | Signature                                                                             | Date                |
|-------------------------|------------|-------------|-------------------------------------------------------------------------------------------------------------------------------------------------------------------------------|---------------------------------------------------------------------------------------|---------------------|
| 1 <sup>st</sup> author  | Dong Suk   | Yoon        | I agree to the proposed new authorship shown in section 4 /and the <b>addition/removal*of my name to the authorship list</b> /and the proposed change in corresponding author |    | December 7th , 2021 |
| 2 <sup>nd</sup> author  | Kyoung-Mi  | Lee         | I agree to the proposed new authorship shown in section 4 /and the <b>addition/removal*of my name to the authorship list</b> /and the proposed change in corresponding author |    | December 7th , 2021 |
| 3 <sup>rd</sup> author  | Yoorim     | Choi        | I agree to the proposed new authorship shown in section 4 /and the <b>addition/removal*of my name to the authorship list</b> /and the proposed change in corresponding author |    | December 7th , 2021 |
| 4 <sup>th</sup> authors | Eun Ae     | Ko          | I agree to the proposed new authorship shown in section 4 /and the <b>addition/removal*of my name to the authorship list</b> /and the proposed change in corresponding author |    | December 7th , 2021 |
| 5 <sup>th</sup> author  | Na-Hyun    | Lee         | I agree to the proposed new authorship shown in section 4 /and the <b>addition/removal*of my name to the authorship list</b> /and the proposed change in corresponding author |    | December 7th , 2021 |
| 6 <sup>th</sup> author  | Sehee      | Cho         | I agree to the proposed new authorship shown in section 4 /and the <b>addition/removal*of my name to the authorship list</b> /and the proposed change in corresponding author |  | December 7th , 2021 |
| 7 <sup>th</sup> author  | Kwang Hwan | Park        | I agree to the proposed new authorship shown in section 4 /and the <b>addition/removal*of my name to the authorship list</b> /and the proposed change in corresponding author |  | December 7th , 2021 |

|                         | First name | Family name |                                                                                                                                                                               | Signature            | Date                |
|-------------------------|------------|-------------|-------------------------------------------------------------------------------------------------------------------------------------------------------------------------------|----------------------|---------------------|
| 8 <sup>th</sup> author  | Jung-Hwan  | Lee         | I agree to the proposed new authorship shown in section 4 /and the <b>addition/removal*of my name to the authorship list</b> /and the proposed change in corresponding author | J-H Lee              | December 7th , 2021 |
| 9 <sup>th</sup> author  | Hae-Won    | Kim         | I agree to the proposed new authorship shown in section 4 /and the <b>addition/removal*of my name to the authorship list</b> /and the proposed change in corresponding author | Hae-Won Kim          | December 7th , 2021 |
| 10 <sup>th</sup> author | Jin Woo    | Lee         | I agree to the proposed new authorship shown in section 4 /and the <b>addition/removal*of my name to the authorship list</b> /and the proposed change in corresponding author | 01 21 <sup>o</sup> T | December 7th , 2021 |

Please use an additional sheet if there are more than 10 authors.

**In case of author collaborations with formal agreement:**

|                                | Name of consortium/consortia | First name | Family name |                                                                                                                                                                               | Signature | Date |
|--------------------------------|------------------------------|------------|-------------|-------------------------------------------------------------------------------------------------------------------------------------------------------------------------------|-----------|------|
| Representative/legal guarantor |                              |            |             | I agree to the proposed new authorship shown in section 4 /and the <b>addition/removal*of my name to the authorship list</b> /and the proposed change in corresponding author |           |      |

**Both added/removed authors should complete the information in the first table under Section 6.**

---- End of form ----
